# Supplementary material
Source: MDPI journal article supplement (https://www.mdpi.com/2073-4441/13/9/1197)
Supplement: s1 [file s1 › water-1155770-SI.pdf]

## Supplementary materials for:

### Adapting Santiago method to determine appropriate and resource efficient sanitation systems for an urban settlement in Lima Peru

Ainul Firdatun Nisaa <sup>1,2</sup>, Manuel Krauss <sup>1,3\*</sup> and Dorothee Spuhler <sup>4</sup>

<sup>1</sup>Institute for Sanitary Engineering, Water Quality and Solid Waste Management, University of Stuttgart, 70569 Stuttgart, Germany

<sup>2</sup>Department of Environmental Engineering, Institut Teknologi Sepuluh Nopember, 60111 Surabaya, Indonesia; firdatun@its.ac.id, (current affiliation)

<sup>3</sup>Research Institute for Water and Waste Management at the RWTH Aachen University (FiW) e. V., 52072 Aachen, Germany (current affiliation)

<sup>4</sup>Swiss Federal Institute for Aquatic Science and Technology, 8600 Dübendorf, Switzerland; dorothee.spuhler@eawag.ch

\*Correspondence: mail@manuel-krauss.de; Tel.: +49(0)241-802-6843

**Table S1.** Summary of the case profile used as inputs

|   | Screening criteria <sup>1</sup> | Case questions and metrics <sup>1</sup>                                                                                                                                                                   | Probability function <sup>2</sup>  | Description                                                                                                               |
|---|---------------------------------|-----------------------------------------------------------------------------------------------------------------------------------------------------------------------------------------------------------|------------------------------------|---------------------------------------------------------------------------------------------------------------------------|
| 1 | Water supply                    | <i>What type of water supply is used by households?</i><br>Categories:<br>a = none<br>b = water well or spring or river (public)<br>c = water tank or truck or pylon (yard)<br>d = public network (house) | dcat<br>c(a=0,b=0.09,c=0.41,d=0.5) | The proportion of households received or fetched water supply from a, b, c and d are 0%, 9%, 41% and 5% respectively [1]. |
| 2 | Energy supply                   | <i>How many hours a day is electricity available at the household or facility level?</i><br>(hours/day)                                                                                                   | dtrapez<br>a=0,b=22,c=24,d=24      | The daily supply of the energy is between 0 to 24 hours, commonly between 22 to 24 hours [1].                             |

|    | Screening criteria <sup>1</sup> | Case questions and metrics <sup>1</sup>                                                                                              | Probability function <sup>2</sup>                                     | Description                                                                                                                                                                                              |
|----|---------------------------------|--------------------------------------------------------------------------------------------------------------------------------------|-----------------------------------------------------------------------|----------------------------------------------------------------------------------------------------------------------------------------------------------------------------------------------------------|
| 3  | Water supply disruption         | <i>How often does the water supply interrupt at the household level?</i><br>(hours/day)                                              | dttrapez<br>a=1,b=1,c=3,d=24                                          | The probability of water supply getting disrupted is between 1 to 24 hours daily, commonly between 1 to 3 hours daily [1].                                                                               |
| 4  | Energy supply disruption        | <i>How often does the energy supply interrupt in a household?</i> (hours/day)                                                        | dttrapez<br>a=1,b=1,c=3,d=24                                          | The probability of energy supply getting disrupted is between 1 to 24 hours daily, commonly between 1 to 3 hours daily [1].                                                                              |
| 5  | Frequency of O&M                | <i>How feasible is it to find O&amp;M labour for a specific workload?</i><br>(days/months/household )                                | prange<br>lower=0,upper=2                                             | The number of days per households / working units assumed to execute O&M for a given technology to be performed 100% is between 0 to 2 days per month based on the personal assessment (PA).             |
| 6  | Spare parts supply              | <i>How accessible are spare parts of each category?</i><br>Categories:<br>1- low-tech, 2- technical parts, 3- specially manufactured | pcat<br>c(low.tech=1, technical.parts=1, specially.manufacture d=0.3) | The capacity of the case study area to present spare parts supplies for both less advanced technology (low tech) and technical parts are 100%, while for specially manufactured tech is 30% based on PA. |
| 7  | Temperature                     | <i>What is the daily average temperature for one year?</i><br>(°C)                                                                   | dttriangle<br>a=12,b=28,c=20                                          | The min and max temperatures in the case study area are 12 and 28 °C respectively with the average of 20 °C yearly [2].                                                                                  |
| 8  | Flooding                        | <i>How high are flooding levels at households or the facility?</i> (water height in cm)                                              | drange<br>lower=0,upper=1                                             | Average flood heights are between 0 to 1 cm [3,4].                                                                                                                                                       |
| 9  | Vehicular access                | <i>What is the width of the access roads to the technologies?</i> (street width in m)                                                | dttrapez<br>a=0,b=4,c=7,d=10                                          | Street widths vary between 0 to 10 m, with the average of 4 to 7 m based on PA and [5].                                                                                                                  |
| 10 | Slope                           | <i>What is the slope distribution in the settlement?</i> (%)                                                                         | dttriangle<br>a=0,b=40,c=18                                           | The min and max slopes in the case study area are 0 and 18% with the average of 40% based on PA and [5].                                                                                                 |
| 11 | Soil type                       | <i>What is the soil type in the case-area?</i><br>Categories:<br>a=clay, b=silt, c=sand, d=gravel                                    | dcat<br>c(clay=0.05, silt=0.05, sand=0.1, gravel=0.8)                 | The distribution of soil types in the case study area are clay (5%), silt (5%), sand (10%) and gravel (80%) based on PA and [6].                                                                         |
| 12 | Groundwater depth               | <i>What is the groundwater table at the households or the facility?</i> (water table in m)                                           | dttrapez<br>a=3,b=6,c=50,d=100                                        | The min and max groundwater tables in the case study area are at 3 and 100 m respectively with the average of 6 to 50 m based on PA.                                                                     |

|    | Screening criteria <sup>1</sup> | Case questions and metrics <sup>1</sup>                                                                                                                                                                                                                                          | Probability function <sup>2</sup>                     | Description                                                                                                                                      |
|----|---------------------------------|----------------------------------------------------------------------------------------------------------------------------------------------------------------------------------------------------------------------------------------------------------------------------------|-------------------------------------------------------|--------------------------------------------------------------------------------------------------------------------------------------------------|
| 13 | Surface area on-site            | <p><i>How much surface area (m<sup>2</sup>) is available between the houses?</i></p> <p>Categories:</p> <p>1-low</p> <p>2-moderate</p> <p>3-high</p> <p>Assumptions:</p> <p>low = 0-5</p> <p>moderate = 6-50</p> <p>high = 50+</p>                                               | <p>dcat</p> <p>c(low=0.7, moderate=0.2, high=0.1)</p> | The availability of on-site facility areas for the given assumptions is mainly low (70%) based on PA.                                            |
| 14 | Surface area off-site           | <p><i>How much surface area (m<sup>2</sup>) is available at the facility site?</i></p> <p>Categories:</p> <p>1-low</p> <p>2-moderate</p> <p>3-high</p> <p>Assumptions:</p> <p>low = 0-50</p> <p>moderate = 51-200</p> <p>high = 200+</p>                                         | <p>dcat</p> <p>c(low=0.6, moderate=0.2, high=0.2)</p> | The availability of off-site facility areas for the given assumptions is mainly low (60%) based on PA.                                           |
| 15 | Construction skills             | <p><i>What levels of professions for construction are available in this area?</i></p> <p>Categories:</p> <p>1-none</p> <p>2-mason</p> <p>3-specially trained mason</p> <p>4-construction engineer</p> <p>5-supervisor</p>                                                        | <p>ptrapez</p> <p>a=1,b=2,c=5,d=5</p>                 | The min and max construction skills available in the case study area are skill 1 and 5, commonly available is between skills 2 to 5 based on PA. |
| 16 | Design skills                   | <p><i>What levels of professions for design are available in this area?</i></p> <p>Categories:</p> <p>1-none</p> <p>2-unskilled labour</p> <p>3-mason</p> <p>4-specially trained mason</p> <p>5-planning engineer</p> <p>6-supervisor</p>                                        | <p>ptrapez</p> <p>a=1,b=2,c=6,d=6</p>                 | The min and max construction skills available in the case study area are skill 1 and 6, commonly available is between skills 2 to 6 based on PA. |
| 17 | O&M skills                      | <p><i>What level of professions for O&amp;M are available in this area?</i></p> <p>Categories:</p> <p>1-none</p> <p>2-unskilled labour</p> <p>3-specially trained labour</p> <p>4-technician</p> <p>5-supervisor</p> <p>6-administrator</p> <p>7-engineer</p> <p>8-scientist</p> | <p>ptrapez</p> <p>a=1,b=2,c=7,d=7</p>                 | The min and max construction skills available in the case study area are skill 1 and 7, commonly available is between skills 2 to 7 based on PA. |

|    | Screening criteria <sup>1</sup> | Case questions and metrics <sup>1</sup>                                                                       | Probability function <sup>2</sup>                      | Description                                                                                                                                           |
|----|---------------------------------|---------------------------------------------------------------------------------------------------------------|--------------------------------------------------------|-------------------------------------------------------------------------------------------------------------------------------------------------------|
| 18 | Management                      | <i>What kind of management is possible/preferred?</i><br>Categories:<br>1-household,<br>2-shared,<br>3-public | dcat<br>c(household=0.8,<br>shared=0.1,<br>public=0.1) | Household management is assumed to be more applicable in the case study area (80%), followed by shared (10%) and public management (10%) based on PA. |

<sup>1</sup>adapted from [7].

<sup>2</sup>the probability function can be a range, triangle, trapezium, or category function. Each screening criteria or attribute consists of one probability density or distribution function (d-function) and one conditional probability or performance function (p-function). The method is based on [7].

**Table S2.** Summary of the technology profile example used as inputs

| Nr.               | Screening criteria <sup>1</sup> | Possible technology probability function <sup>2</sup> | Fossa alterna (S)                                           | Condominial sewer (C)                                       | Anaerobic filter (T)                                        | Trickling filter (T)                                              | Activated sludge (T)                                              |
|-------------------|---------------------------------|-------------------------------------------------------|-------------------------------------------------------------|-------------------------------------------------------------|-------------------------------------------------------------|-------------------------------------------------------------------|-------------------------------------------------------------------|
| <b>References</b> |                                 |                                                       | [8–12]                                                      | [13]                                                        | [14–17]                                                     | [9,18–24]                                                         | [9,20,25–32]                                                      |
| <b>Technical</b>  |                                 |                                                       |                                                             |                                                             |                                                             |                                                                   |                                                                   |
| 1                 | Water supply                    | pcat                                                  | n.a.                                                        | n.a.                                                        | n.a.                                                        | n.a.                                                              | n.a.                                                              |
| 2                 | Energy supply                   | prange; ptriangle                                     | lower=0, upper=24                                           | lower=0, upper=24                                           | lower=0, upper=24                                           | a=0, b=24, c=24                                                   | a=0, b=24, c=24                                                   |
| 3                 | Water supply disruption         | prange; ptriangle                                     | n.a.                                                        | n.a.                                                        | n.a.                                                        | n.a.                                                              | n.a.                                                              |
| 4                 | Energy supply disruption        | prange; ptriangle                                     | lower=0, upper=24                                           | lower=0, upper=24                                           | lower=0, upper=24                                           | a=0, b=24, c=0                                                    | a=0, b=24, c=0                                                    |
| 5                 | Frequency of O&M                | drange; dtriangle                                     | lower=1, upper=4                                            | a=0, b=4, c=2                                               | lower=1, upper=2                                            | lower=1, upper=2                                                  | lower=1, upper=2                                                  |
| 6                 | Spare parts supply              | dcat                                                  | c(low.tech=1, technical.parts=0, specially.manufacture d=0) | c(low.tech=1, technical.parts=0, specially.manufacture d=0) | c(low.tech=1, technical.parts=0, specially.manufacture d=0) | c(low.tech=0.5, technical.parts=0.4, specially.manufactured =0.1) | c(low.tech=0.5, technical.parts=0.4, specially.manufactured =0.1) |
| <b>Physical</b>   |                                 |                                                       |                                                             |                                                             |                                                             |                                                                   |                                                                   |
| 7                 | Temperature                     | prange; ptriangle; ptrapez                            | lower=15, upper=24                                          | lower=-10, upper=50                                         | a=5, b=15, c=35, d=50                                       | a=-5, b=10, c=40, d=50                                            | a=-5, b=10, c=40, d=50                                            |
| 8                 | Flooding                        | prange; ptrapez                                       | a=0, b=0, c=6, d=30                                         | a=0, b=0, c=20, d=365                                       | a=0, b=0, c=6, d=60                                         | a=0, b=0, c=6, d=60                                               | a=0, b=0, c=12, d=60                                              |
| 9                 | Vehicular access                | prange; ptrapez                                       | a=1, b=3, c=100, d=100                                      | a=1, b=3, c=100, d=101                                      | a=1, b=3, c=100, d=100                                      | a=1, b=3, c=100, d=100                                            | a=1, b=3, c=100, d=100                                            |
| 10                | Slope                           | prange; ptrapez                                       | a=0, b=0, c=5, d=25                                         | a=0.5, b=4, c=100, d=100                                    | a=0, b=0, c=50, d=100                                       | a=0, b=0, c=0, d=100                                              | a=0, b=0, c=0, d=100                                              |
| 11                | Soil type                       | pcat                                                  | c(clay=0,silt=0.5, sand=1, gravel=1)                        | c(clay=1,silt=1, sand=1, gravel=1)                          | c(clay=0.5,silt=1, sand=1, gravel=0.5)                      | c(clay=1,silt=1,sand=1, gravel=1)                                 | c(clay=1,silt=1,sand=1, gravel=1)                                 |
| 12                | Groundwater depth               | prange; ptrapez                                       | a=3.5, b=6, c=100, d=100                                    | a=3, b=7, c=100, d=100                                      | lower=3.5, upper=100                                        | lower=0, upper=100                                                | lower=2, upper=100                                                |
| 13                | Surface area on-site            | pcat                                                  | c(low=1, moderate=1, high=1)                                | n.a.                                                        | n.a.                                                        | n.a.                                                              | n.a.                                                              |

| Nr.                            | Screening criteria <sup>1</sup> | Possible technology probability function <sup>2</sup> | Fossa alterna (S)                                                                                        | Condominial sewer (C)                                                                 | Anaerobic filter (T)                                                                                                    | Trickling filter (T)                                                                                                   | Activated sludge (T)                                                                                                     |
|--------------------------------|---------------------------------|-------------------------------------------------------|----------------------------------------------------------------------------------------------------------|---------------------------------------------------------------------------------------|-------------------------------------------------------------------------------------------------------------------------|------------------------------------------------------------------------------------------------------------------------|--------------------------------------------------------------------------------------------------------------------------|
| 14                             | Surface area off-site           | pcat                                                  | n.a.                                                                                                     | n.a.                                                                                  | c(low=0.5, moderate=1, high=1)                                                                                          | c(low=0, moderate=1, high=1)                                                                                           | c(low=0, moderate=1, high=1)                                                                                             |
| <b>Capacity and managerial</b> |                                 |                                                       |                                                                                                          |                                                                                       |                                                                                                                         |                                                                                                                        |                                                                                                                          |
| 15                             | Construction skills             | drange; dtriangle                                     | a=1, b=3, c=2                                                                                            | lower=3, upper=5                                                                      | a=2, b=4, c=3                                                                                                           | a=3, b=5, c=4                                                                                                          | a=1, b=3, c=2                                                                                                            |
| 16                             | Design skills                   | dtriangle                                             | a=3, b=5, c=4                                                                                            | a=4, b=6, c=5                                                                         | a=3, b=5, c=4                                                                                                           | a=4, b=6, c=5                                                                                                          | a=3, b=5, c=4                                                                                                            |
| 17                             | O&M skills                      | drange; dtriangle                                     | a=2, b=4, c=3                                                                                            | lower=3, upper=5                                                                      | a=2, b=4, c=3                                                                                                           | a=2, b=4, c=3                                                                                                          | a=2, b=4, c=3                                                                                                            |
| 18                             | Management                      | pcat                                                  | c(household=1,shared=1, public=0.5)                                                                      | c(household=0.5,share d=1, public=1)                                                  | c(household=0.5,share d=1, public=1)                                                                                    | c(household=0,shared=0, public=1)                                                                                      | c(household=0,shared=0, public=1)                                                                                        |
| <b>Transfer coefficients</b>   |                                 |                                                       |                                                                                                          |                                                                                       |                                                                                                                         |                                                                                                                        |                                                                                                                          |
| Total phosphorus               |                                 |                                                       | Pit humus = 0.60<br>Air-loss = 0.00<br>Soil-loss = 0.40<br>Water-loss = 0.00<br>k = 100                  | Effluent = 0.90<br>Air-loss = 0.00<br>Soil-loss = 0.10<br>Water-loss = 0.00<br>k = 25 | Sludge = 0.67<br>[0.48 – 0.86]<br>Effluent = 0.33<br>Air-loss = 0.00<br>Soil-loss = 0.00<br>Water-loss = 0.00<br>k = 25 | Sludge = 0.26<br>[0.10 – 0.50]<br>Effluent = 0.74<br>Air-loss = 0.00<br>Soil-loss = 0.00<br>Water-loss = 0.00<br>k = 5 | Sludge = 0.50<br>[0.00 – 0.88]<br>Effluent = 0.50<br>Air-loss = 0.00<br>Soil-loss = 0.00<br>Water-loss = 0.00<br>k = 0.5 |
| Total nitrogen                 |                                 |                                                       | Pit humus = 0.65<br>[0.60 – 0.70]<br>Air-loss = 0.00<br>Soil-loss = 0.35<br>Water-loss = 0.00<br>k = 100 | Effluent = 0.85<br>Air-loss = 0.05<br>Soil-loss = 0.10<br>Water-loss = 0.00<br>k = 25 | Sludge = 0.22<br>[0.15 – 0.56]<br>Effluent = 0.78<br>Air-loss = 0.00<br>Soil-loss = 0.00<br>Water-loss = 0.00<br>k = 2  | Sludge = 0.39<br>[0.00 – 0.64]<br>Effluent = 0.61<br>Air-loss = 0.00<br>Soil-loss = 0.00<br>Water-loss = 0.00<br>k = 1 | Sludge = 0.46<br>[0.00 – 0.63]<br>Effluent = 0.54<br>Air-loss = 0.00<br>Soil-loss = 0.00<br>Water-loss = 0.00<br>k = 1   |
| Total solids                   |                                 |                                                       | Pit humus = 0.85<br>Air-loss = 0.05<br>Soil-loss = 0.10<br>Water-loss = 0.00<br>k = 5                    | Effluent = 0.90<br>Air-loss = 0.00<br>Soil-loss = 0.10<br>Water-loss = 0.00<br>k = 25 | Sludge = 0.64<br>[0.39 – 0.73]<br>Effluent = 0.36<br>Air-loss = 0.00<br>Soil-loss = 0.00                                | Sludge = 0.2<br>[0.14 – 0.72]<br>Effluent = 0.80<br>Air-loss = 0.00<br>Soil-loss = 0.00                                | Sludge = 0.94<br>[0.75 – 0.99]<br>Effluent = 0.06<br>Air-loss = 0.00<br>Soil-loss = 0.00                                 |

| Nr.   | Screening criteria <sup>1</sup> | Possible technology probability function <sup>2</sup> | Fossa alterna (S)            | Condominial sewer (C)         | Anaerobic filter (T)                              | Trickling filter (T)                              | Activated sludge (T)                              |
|-------|---------------------------------|-------------------------------------------------------|------------------------------|-------------------------------|---------------------------------------------------|---------------------------------------------------|---------------------------------------------------|
| Water |                                 |                                                       |                              |                               | Water-loss = 0.00<br>$k = 5$                      | Water-loss = 0.00<br>$k = 2$                      | Water-loss = 0.00<br>$k = 5$                      |
|       |                                 |                                                       | Pit humus = 0.05             | Effluent = 0.90               | Sludge = 0.05                                     | Sludge = 0.04                                     | Sludge = 0.04                                     |
|       |                                 |                                                       | Air-loss = 0.10              | Air-loss = 0.00               | Effluent = 0.95                                   | Effluent = 0.93                                   | Effluent = 0.93                                   |
|       |                                 |                                                       | Soil-loss = 0.85             | Soil-loss = 0.10              | Air-loss = 0.00                                   | Air-loss = 0.03                                   | Air-loss = 0.03                                   |
|       |                                 |                                                       | Water-loss = 0.00<br>$k = 5$ | Water-loss = 0.00<br>$k = 25$ | Soil-loss = 0.00<br>Water-loss = 0.00<br>$k = 25$ | Soil-loss = 0.00<br>Water-loss = 0.00<br>$k = 25$ | Soil-loss = 0.00<br>Water-loss = 0.00<br>$k = 25$ |

<sup>1</sup>adapted from [36].

<sup>2</sup>the probability function can be a range, triangle, trapezium, or category function. Each screening criteria or attribute consists of one probability density or distribution function (d-function) and one conditional probability or performance function (p-function). The method is based on [7].

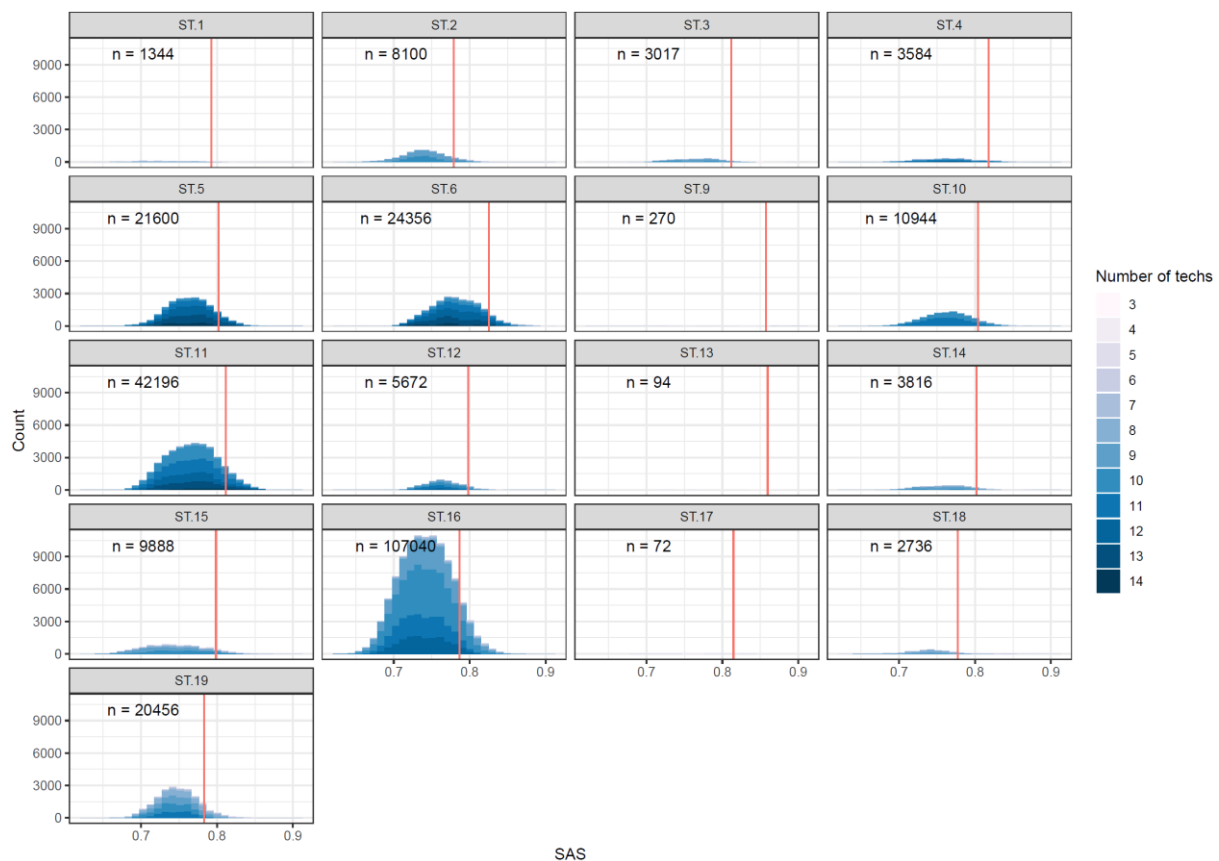

**Figure S1.** Histogram of sanitation system appropriateness score of all valid systems, grouped by system template and colored by the number of technologies per system. The vertical red line indicates the 90<sup>th</sup> percentile of the histogram. (SAS = sanitation system appropriateness score; ST = system template; n = total number of sanitation systems)

## References

1. INEI. *Censos Nacionales 2017: XII de Población, VII de Vivienda y III de Comunidades Indígenas; Sistema de Consule de Datos; Vivienda, Población, Abastecimiento de agua en la vivienda, Servicio higiénico que tiene la vivienda*; Instituto Nacional de Estadística e Informatica (INEI): Lima, Perú, 2018. Available online: <https://censos2017.inei.gob.pe/redatam/> (accessed on 18 October 2019).
2. INEI. *Perú: Anuario de Estadísticas Ambientales*; Instituto Nacional de Estadística e Informatica (INEI): Lima, Perú, 2015.
3. IMP. *Atlas Ambiental de Lima*; Instituto Metropolitano de Planificación (IMP): Lima, Perú, 2007.
4. Oswald, P. *Ecosan - Eine nachhaltige Lösung für die Sanitärprobleme der Marginalsiedlungen Limas (Peru)?* Diplomarbeit; Technische Universität Dresden, Dresden, Germany, 2007.
5. Google; Maxar Technologies. *Quebrada Verde, Pachacamac District, Peru: Eye alt 1.66 km. -12.2119568,-76.8817952*, 7th ed.; Google Earth, Maxar Technologies: Lima, Peru [Satellite Imagery], 2018.
6. Gardi, C.; Angelini, M.; Barceló, S.; Comerma, J.; Cruz Gaistardo, C. (Eds.) *Soil Atlas of Latin America and the Caribbean*; European Commission - Publications Office of the European Union: Luxembourg, 2015, ISBN 978-92-79-46513-0.
7. Spuhler, D.; Roller, L. *Sanitation technology library: details and data sources for appropriateness profiles and transfer coefficients*; Swiss Federal Institute of Aquatic Science and Technology (Eawag): Dübendorf, Switzerland, 2020.
8. Tilley, E.; Ulrich, L.; Lüthi, C.; Reymond, P.; Zurbrügg, C. *Compendium of sanitation systems and technologies*, 2nd rev. ed.; Swiss Federal Institute of Aquatic Science and Technology (Eawag): Dübendorf, 2014, ISBN 978-3-906484-57-0.
9. Maurer, P. *Wastewater Characteristics. Direct Interview*; Institute for Sanitary Engineering, Water Quality and Solid Waste Management; Universität Stuttgart: Stuttgart, Germany, 2019.

10. Eklind, Y.; Kirchmann, H. Composting and storage of organic household waste with different litter amendments. II: Nitrogen turnover and losses. *Bioresour. Technol.* **2000**, *74*, 125–133, doi:10.1016/S0960-8524(00)00005-5.
11. Morgan, P. *The Fossa Alterna: How to Build and Manage the Latrine that Makes Humus!* Aquamor Pvt Ltd: Harare, Zimbabwe, 2003. Available online: [https://aquamor.info/uploads/3/4/2/5/34257237/manual\\_for\\_the\\_fossa\\_alterna.pdf](https://aquamor.info/uploads/3/4/2/5/34257237/manual_for_the_fossa_alterna.pdf) (accessed on 29 July 2020).
12. Jönsson, H.; Stinzing, A.R.; Vinnerås, B.; Salomon, E. *Guidelines on the Use of Urine and Faeces in Crop Production*; Stockholm Environment Institute (SEI): Stockholm, Sweden, 2004. Available online: <https://www.researchgate.net/publication/241465815> (accessed on 29 July 2020).
13. Melo, J.C. *The Experience of Condominial Water and Sewerage Systems in Brazil: Case Studies from Brasilia, Salvador and Parauapebas*; Water and Sanitation Program: Washington, DC, 2005. Available online: <http://documents.worldbank.org/curated/en/505601468226737476/The-experience-of-condominial-water-and-sewerage-systems-in-Brazil-case-studies-from-Brasilia-Salvador-and-Parauebas> (accessed on 29 July 2020).
14. Morel, A.; Diener, S. *Greywater Management in Low and Middle-Income Countries: Review of different treatment systems for households or neighbourhoods*; Sandec at Eawag: Dübendorf, 2006, ISBN 978-3-906484-37-2.
15. Bodík, I.; Herdová, B.; Drtil, M. The use of upflow anaerobic filter and AnSBR for wastewater treatment at ambient temperature. *Water Res.* **2002**, *36*, 1084–1088, doi:10.1016/S0043-1354(01)00308-6.
16. Koottatep, T.; Wanasen, S.; Morel, A.; Schertenleib, R. *Potential of the Anaerobic Baffled Reactor as Decentralized Wastewater Treatment System in the Tropics*; Asian Institute of Technology (AIT): Klong Luang, Thailand; Duebendorf, Switzerland, 2004. Available online: [https://www.susana.org/\\_resources/documents/default/3-1260-7-1459246086.pdf](https://www.susana.org/_resources/documents/default/3-1260-7-1459246086.pdf) (accessed on 29 July 2020).
17. Vandith, V.; Soleh Setiyawan, A.; Soewondo, P.; Bophann, P.; Hardjono; Roosmini, D.; Pribadi, K.; Sugeng, B.; Hadihardaja, I.K. Kinetics of nutrient removal in an on-site domestic wastewater treatment facility. *MATEC Web Conf.* **2018**, *147*, 4004, doi:10.1051/mateconf/201814704004.
18. Nourmohammadi, D.; Esmaeeli, M.-B.; Akbarian, H.; Ghasemian, M. Nitrogen removal in a full-scale domestic wastewater treatment plant with activated sludge and trickling filter. *J. environ. public health* **2013**, *2013*, 504705, doi:10.1155/2013/504705.
19. Vieira, P.C.; Sperling, M. von; Nogueira, L.C.M.; Assis, B.F.S. Performance evaluation of a novel open trickling filter for the post-treatment of anaerobic effluents from small communities. *Water Sci. Technol. J. Int. Assoc. Water Pollut. Res.* **2013**, *67*, 2746–2752, doi:10.2166/wst.2013.195.
20. Tchobanoglous, G. *Wastewater engineering: Treatment and resource recovery*, 5. ed., internat. student ed.; McGraw-Hill: New York, NY, 2014, ISBN 9781259010798.
21. Cannon Associates. *Alternatives Evaluation Report: Morro Bay-Cayucos Wastewater Treatment Plant*; Cannon Associates: San Luis Obispo, CA, USA, 2004.
22. WSP. *Technology Options for Urban Sanitation in India: A Guide to Decision-Making*; Water and Sanitation Program-South Asia: New Delhi, India, 2008.
23. Kim, B.; Gautier, M.; Prost-Boucle, S.; Molle, P.; Michel, P.; Gourdon, R. Performance evaluation of partially saturated vertical-flow constructed wetland with trickling filter and chemical precipitation for domestic and winery wastewaters treatment. *Ecol. Eng.* **2014**, *71*, 41–47, doi:10.1016/j.ecoleng.2014.07.045.
24. UNEP. *A Directory of Environmentally Sound Technologies for the Integrated Management of Solid, Liquid, and Hazardous Waste for SIDS in the Caribbean Region*; United Nations Environment Programme (UNEP) and Caribbean Environmental Health Institute (CEHI): Nairobi, Kenya, 2004.
25. Adonaga, M.G. Nutrient removal efficiency of activated sludge plants treating industrial and municipal wastewater in Ghana. *J. Environ. Pollut. Hum. Health* **2014**, *3*, 58–62.
26. Abdulla, F.; Abu-Qudais, H.; Alfara, A.; Sonneveld, B. Evaluation of wastewater treatment plants in Jordan and suitability for reuse. *Acad. J. Environ. Sci.* **2016**, *4*, 111–117.
27. Torpey, W.N.; Chasick, A.H. Principles of Activated Sludge Operation. *Sewage Ind. Wastes* **1955**, *27*, 1217–1233.
28. Chen, H.-Y.; Andy Hong, P.-K.; Yang, P.-Y.; Kwang Ng, K.; Yang, S.-F.; Lee, C.-H.; Lin, C.-F. A pilot study on suspended activated sludge process augmented with immobilized biomass for simultaneous nitrification and denitrification. *J. Water Reuse Desalination* **2015**, *5*, 157–165, doi:10.2166/wrd.2015.087.

29. Chiang, W.W.; Qasim, S.R.; Zhu, G.; Crosby, E.C. Pilot Scale Study on Retrofitting Conventional Activated Sludge Plant for Biological Nutrient Removal. *Artif. Cells Blood Substit. Biotechnol.* **2009**, *27*, 423–428, doi:10.3109/10731199909117714.
30. Sperling, M.V.; Chernicharo, C. *Biological wastewater treatment in warm climate regions*; IWA Publishing: London, UK, 2005, ISBN 1-84339-002-7.
31. Lan, J.C.; Benefield, L.; Randall, C.W. Phosphorus removal in the activated sludge process. *Water Res.* **1983**, *17*, 1193–1200, doi:10.1016/0043-1354(83)90061-1.
32. ATV-DVWK. *Bemessung von einstufigen Belebungsanlagen*; GFA-Gesellschaft zur Förderung der Abwassertechnik: Hennef, Germany, 2000, ISBN 3-933707-41-2.
